# Supplementary material for: Seminal Plasma piRNA Array Analysis Identifies Possible Biomarker piRNAs for the Diagnosis of Asthenozoospermia
Source: Research Square preprint supplement (doi:10.21203/rs.3.rs-149605/v1), 2021-01-27
Supplement: Supplementary file 2 [file 28d7b6bf128168859a0e0e1f.docx]

Table 1 Basic information and sperm parameters of AZS and controls

| variables | | AZS(n=4) | Control(n=3) | P |
| --- | --- | --- | --- | --- |
| Age | 33±5.3 | | 33.5±6.32 | 0.917 |
| BMI | 23±3.69 | | 24.1±2.79 | 0.933 |
| Smoking |  | |  | 0.87 |
| Yes | 3（75%） | | 2 |  |
| NO | 1（25%） | | 1 |  |
| Drinking |  | |  | 0.97 |
| Yes | 3 | | 3 |  |
| NO | 1 | | 0 |  |
| Sperm volume(ml) | 4±0.58 | | 3±0.73 | 0.88 |
| pH | 7.7±0.15 | | 7.7±0.17 | 0.53 |
| Sperm density(x 106/ml) | 68.59±6.34 | | 24.12±5.43 | <0.001 |
| PR | 15.18±3.2 | | 60.55±4.2 | <0.001 |
| Sperm activity rate | 20.12±5.34 | | 76.34±4.2 | <0.001 |
| Abbreviations: PR, progressive motility. P<0.01 was considered statistically significant | | | | |
