# Supplementary material for: Seminal Plasma piRNA Array Analysis Identifies Possible Biomarker piRNAs for the Diagnosis of Asthenozoospermia
Source: Research Square preprint supplement (doi:10.21203/rs.3.rs-149605/v1), 2021-01-27
Supplement: Supplementary file 3 [file 21be11b2b2c1358ce296a721.docx]

Table 2 The differentially expressed genes between AZS and controls (top 10)

|  |  | Up-regulated | |  | |  | |  | Down-regulated | |  |
| --- | --- | --- | --- | --- | --- | --- | --- | --- | --- | --- | --- |
| Gene | | logFC | P-value | | |  | Gene | | logFC | P-value |
| 1 | piR-26591 | | 8.490985 | | 0.004693 | |  | piR-15551 | | -6.52024 | 0.009999 |
| 2 | piR-32694 | 7.712583 | | 0.000754 | |  | | piR-29529 | | -6.49304 | 0.009822 |
| 3 | piR-18725 | 7.221809 | | 0.009867 | |  | | piR-25106 | | -6.17803 | 0.006124 |
| 4 | piR-16782 | 6.333706 | | 0.006759 | |  | | piR-2645 | | -5.63236 | 0.006583 |
| 5 | piR-25491 | 6.224344 | | 0.004153 | |  | | piR-9170 | | -5.57597 | 0.002927 |
| 6 | piR-5952 | 5.67597 | | 0.006451 | |  | | piR-2912 | | -5.32921 | 0.003 |
| 7 | piR-18611 | 5.669888 | | 0.008762 | |  | | piR-23203 | | -4.82064 | 0.005891 |
| 8 | piR-18586 | 5.527972 | | 0.009949 | |  | | piR-6148 | | -4.6561 | 0.007541 |
| 9 | piR-15811 | 5.406727 | | 0.007682 | |  | | piR-32713 | | -4.10666 | 0.006346 |
| 10 | piR-17725 | 4.956704 | | 0.004188 | |  | | piR-29155 | | -4.07376 | 0.009545 |
| total | 114 | | | | | | | 169 | |  |  |
| Abbreviation: FC: fold change P < 0.01 was considered statistically significant | | | | | | | | | | | |
